# Supplementary material for: Foxp3+ regulatory T cells maintain the bone marrow microenvironment for B cell lymphopoiesis
Source: PubMed Central journal article supplement (PMC5436085; doi:10.1038/ncomms15068), 2017-05-09
Supplement: ncomms15068-s1.pdf [file ncomms15068-s1.pdf]

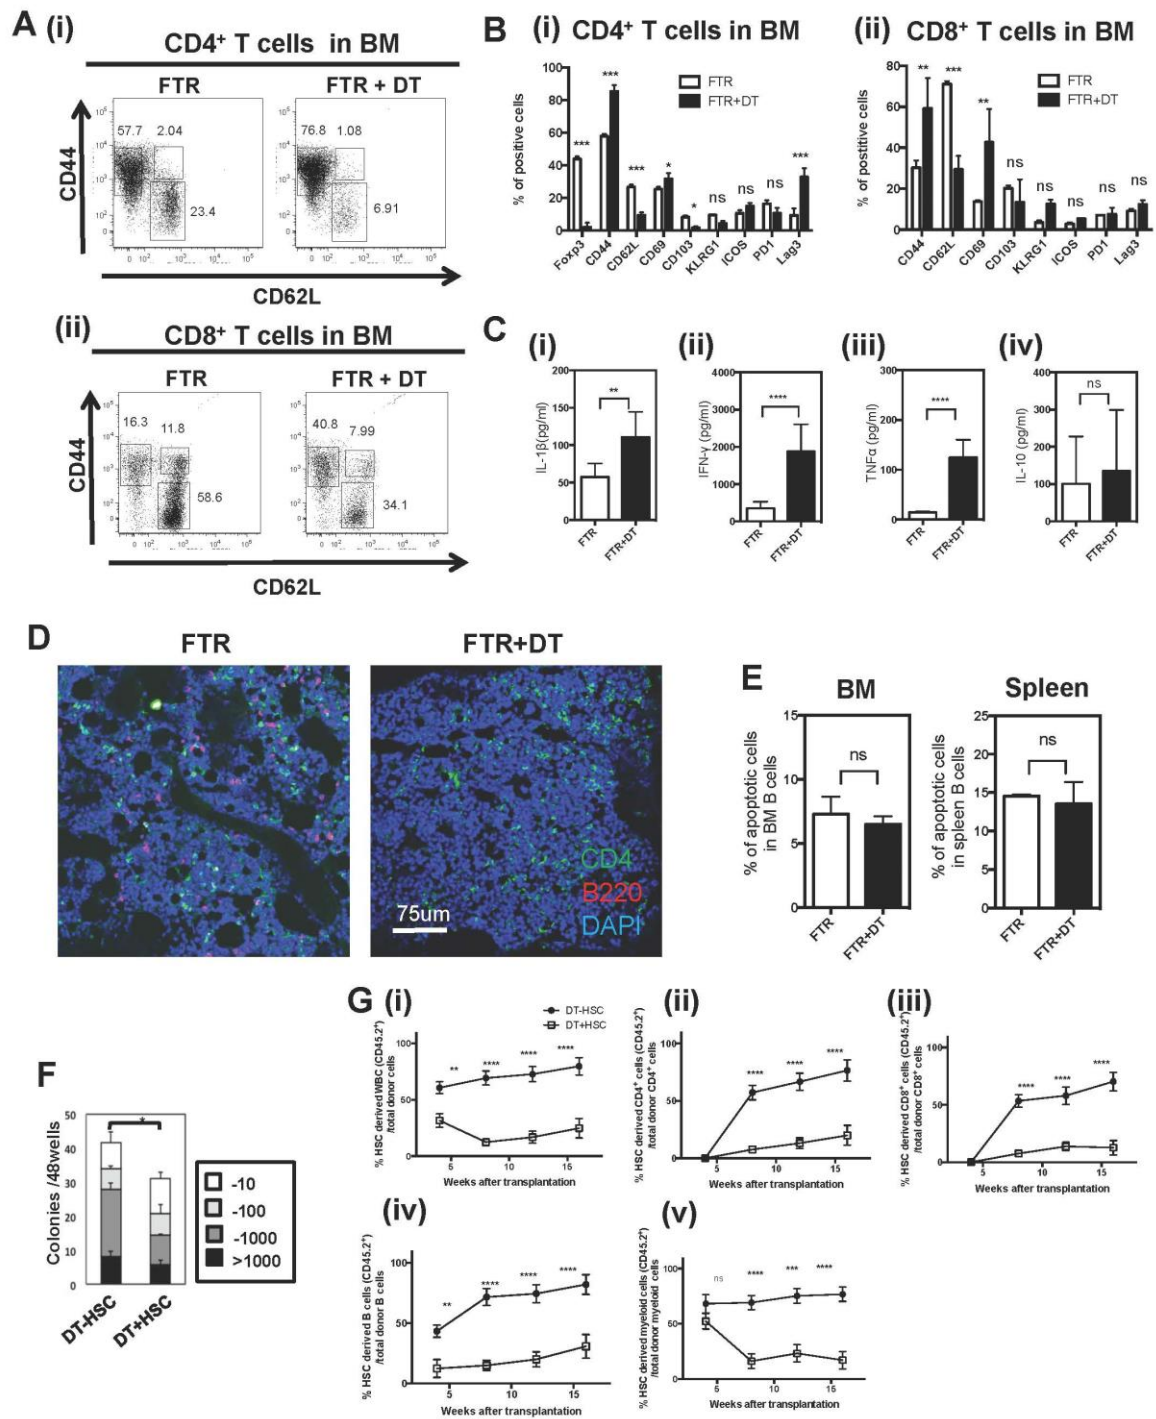

Supplementary Fig 1. Activation of self-reactive BM T cells following Treg depletion.

**A**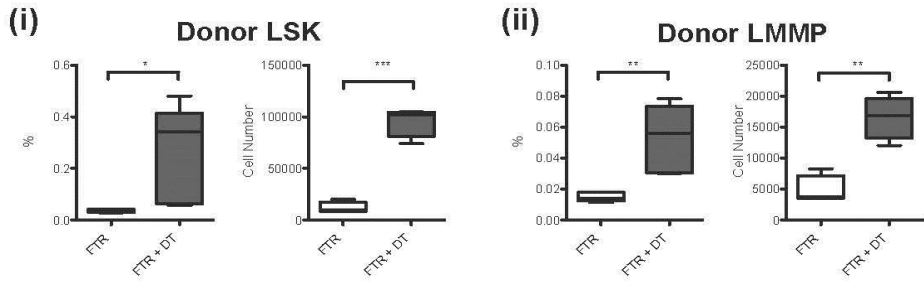**B**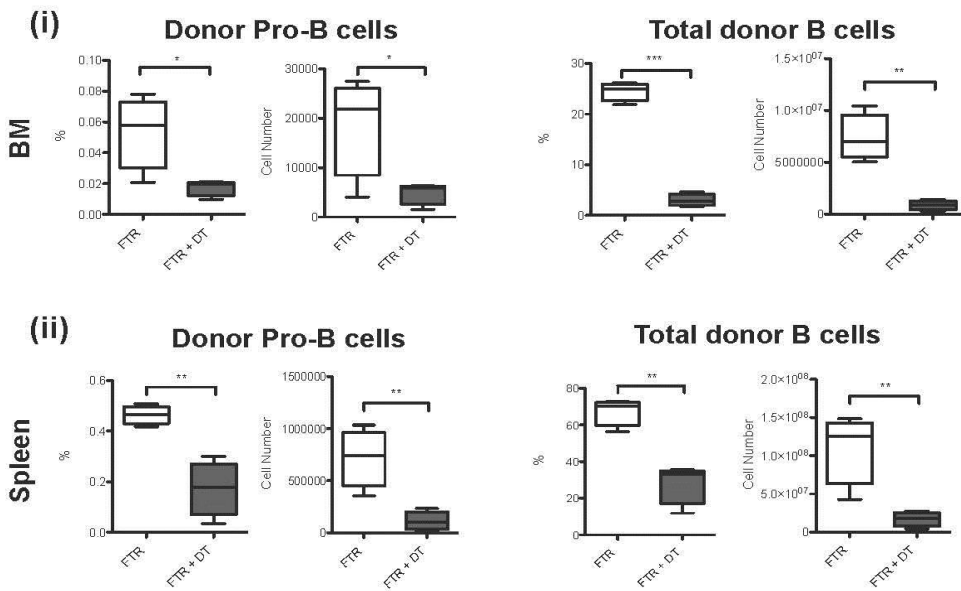**C**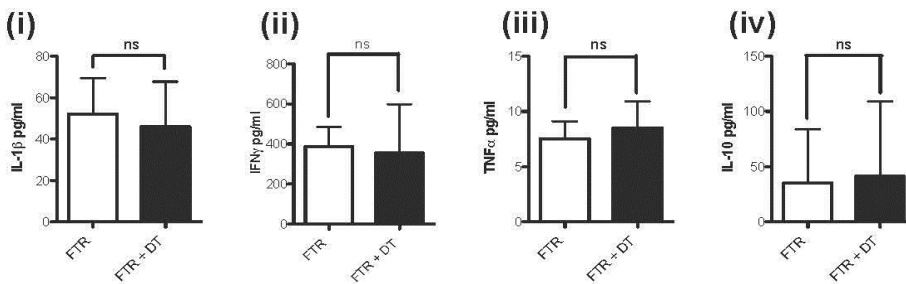

**Supplementary Fig 2.** Host-Treg depletion induces a block in the early phases of B cell differentiation after syngeneic transplantation

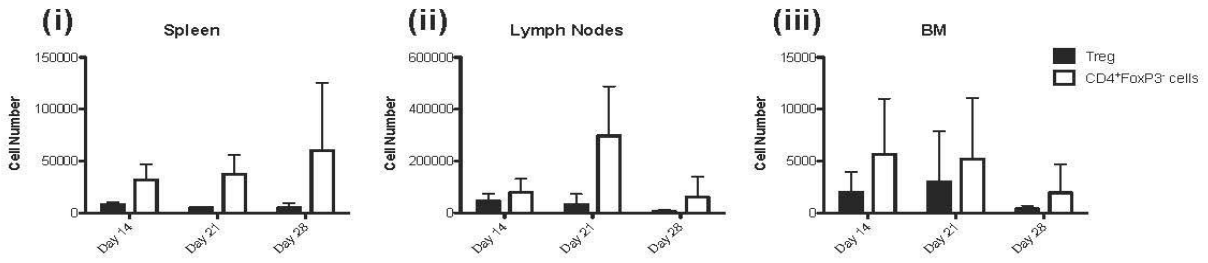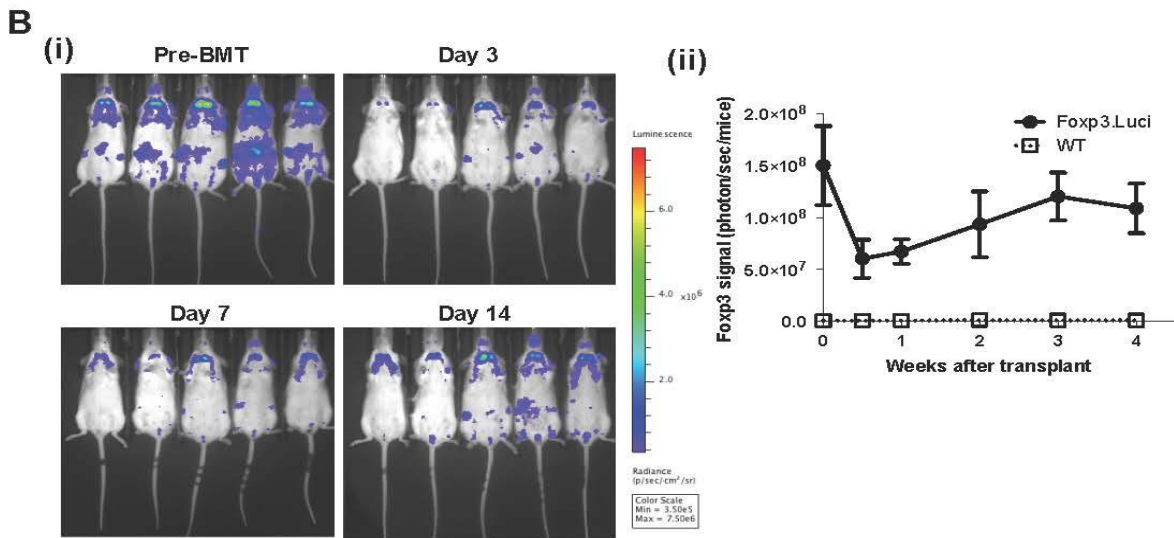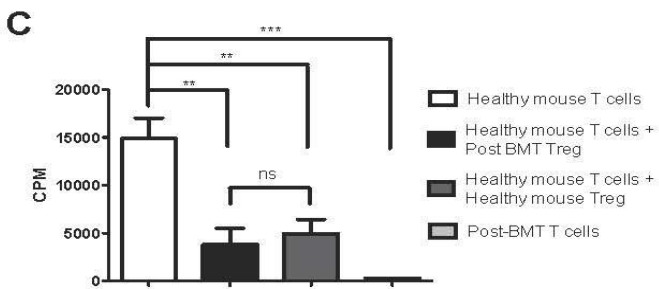

**Supplementary Fig 3.** Residual host derived Treg after transplantation retain suppressive function.

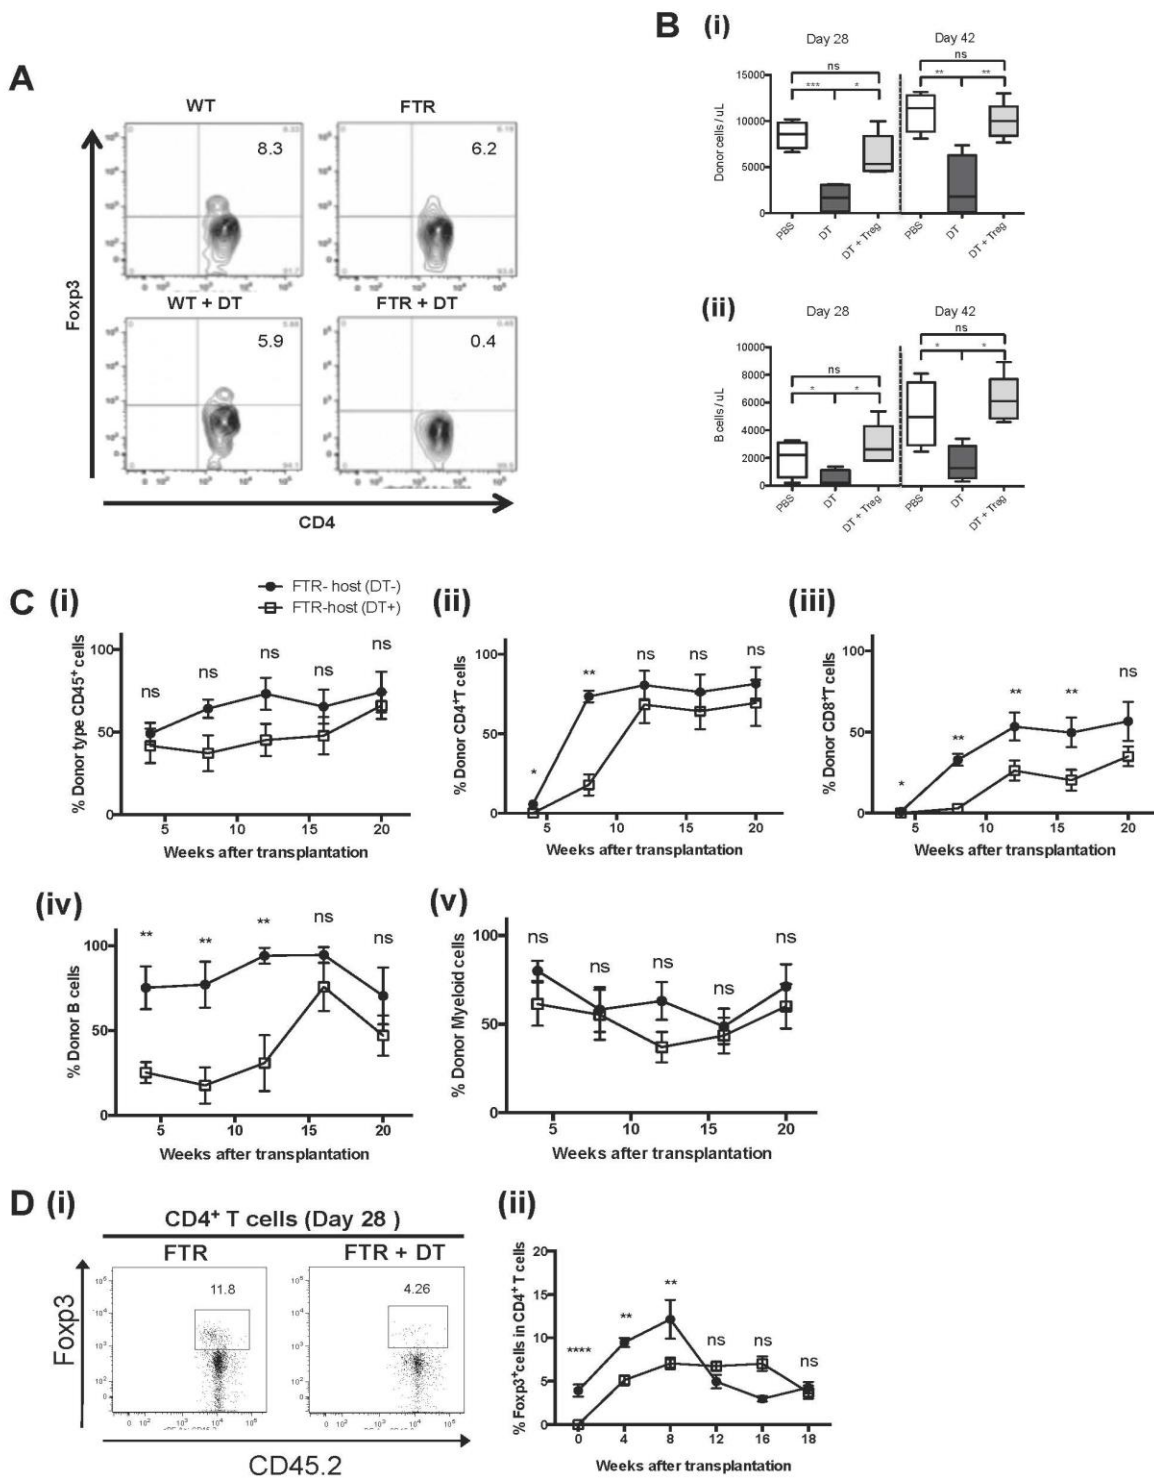

**Supplementary Fig 4.** Host Treg adoptive transfer rescues donor engraftment and B cell reconstitution in Treg-depleted allogeneic transplanted mice.

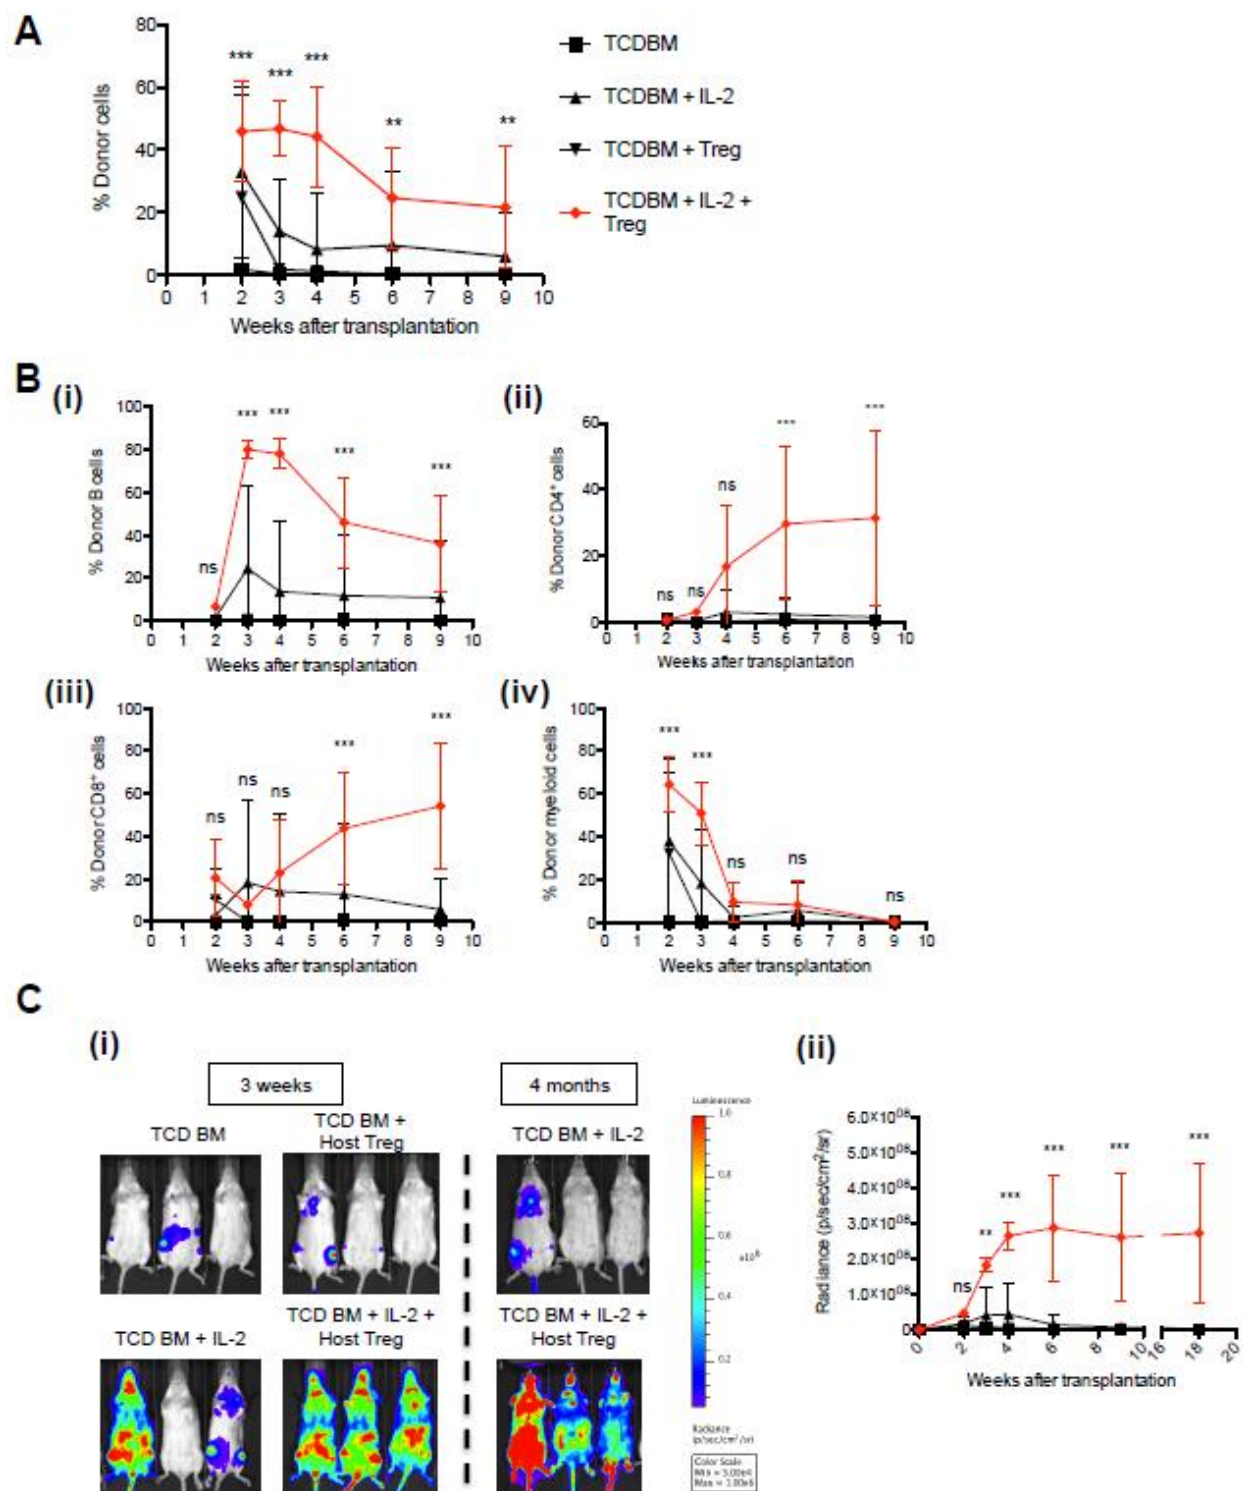

**Supplementary Fig 5.** In vivo treatment with host Treg and low doses of IL-2 promotes donor engraftment and donor lymphoid reconstitution in sublethally irradiated transplanted immune competent mice

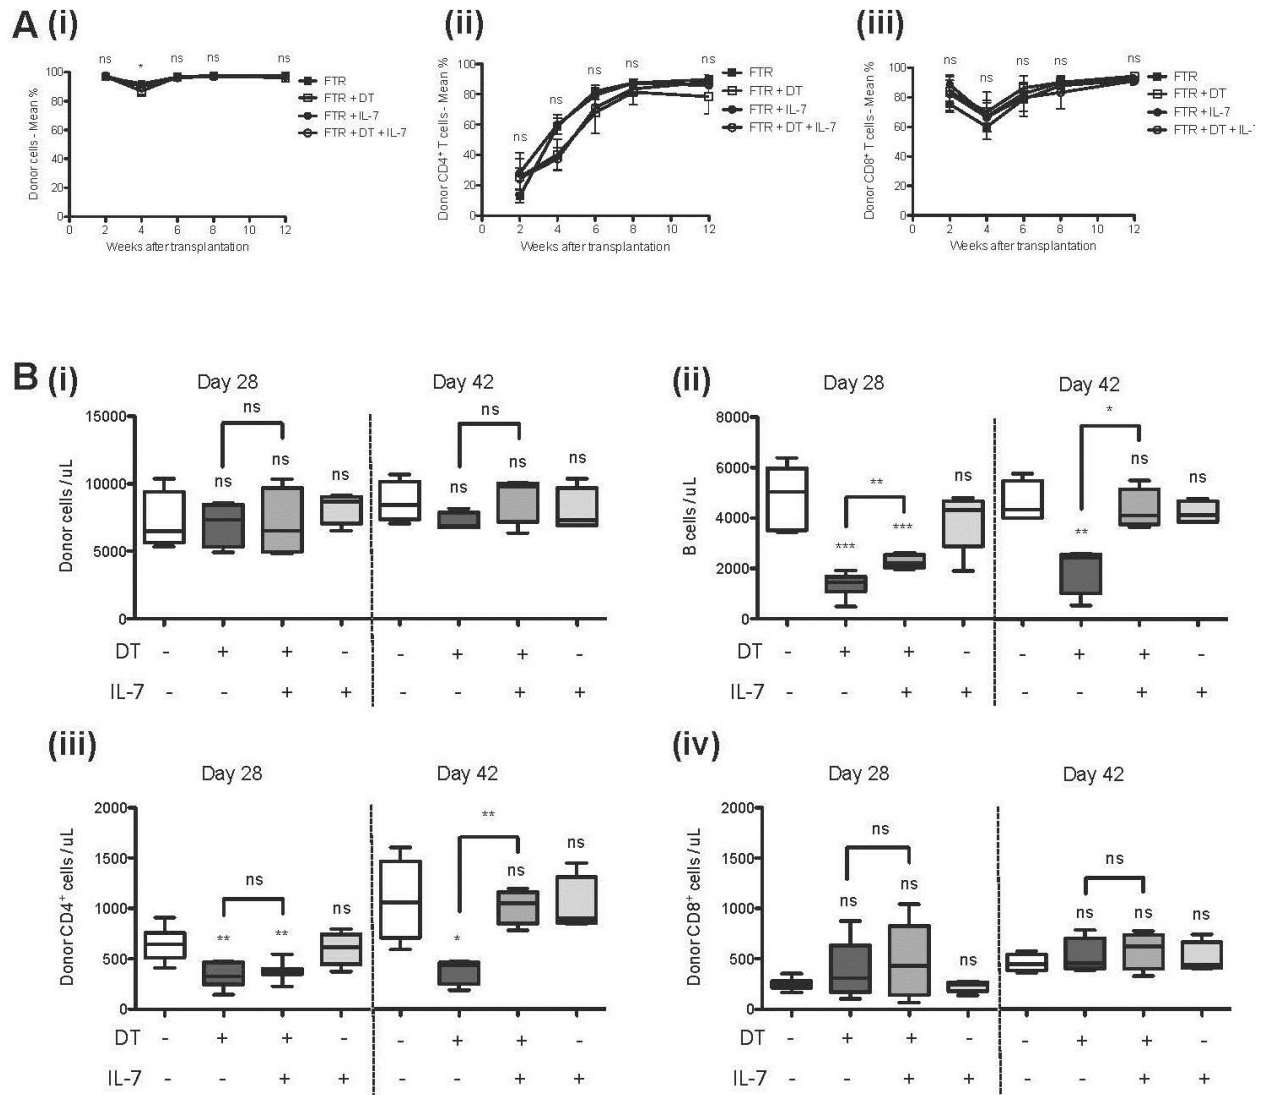

**Supplementary Fig 6.** IL-7 treatment rescues donor B cell reconstitution without impacting other lymphoid cell lineages in syngeneic transplanted Treg-depleted mice

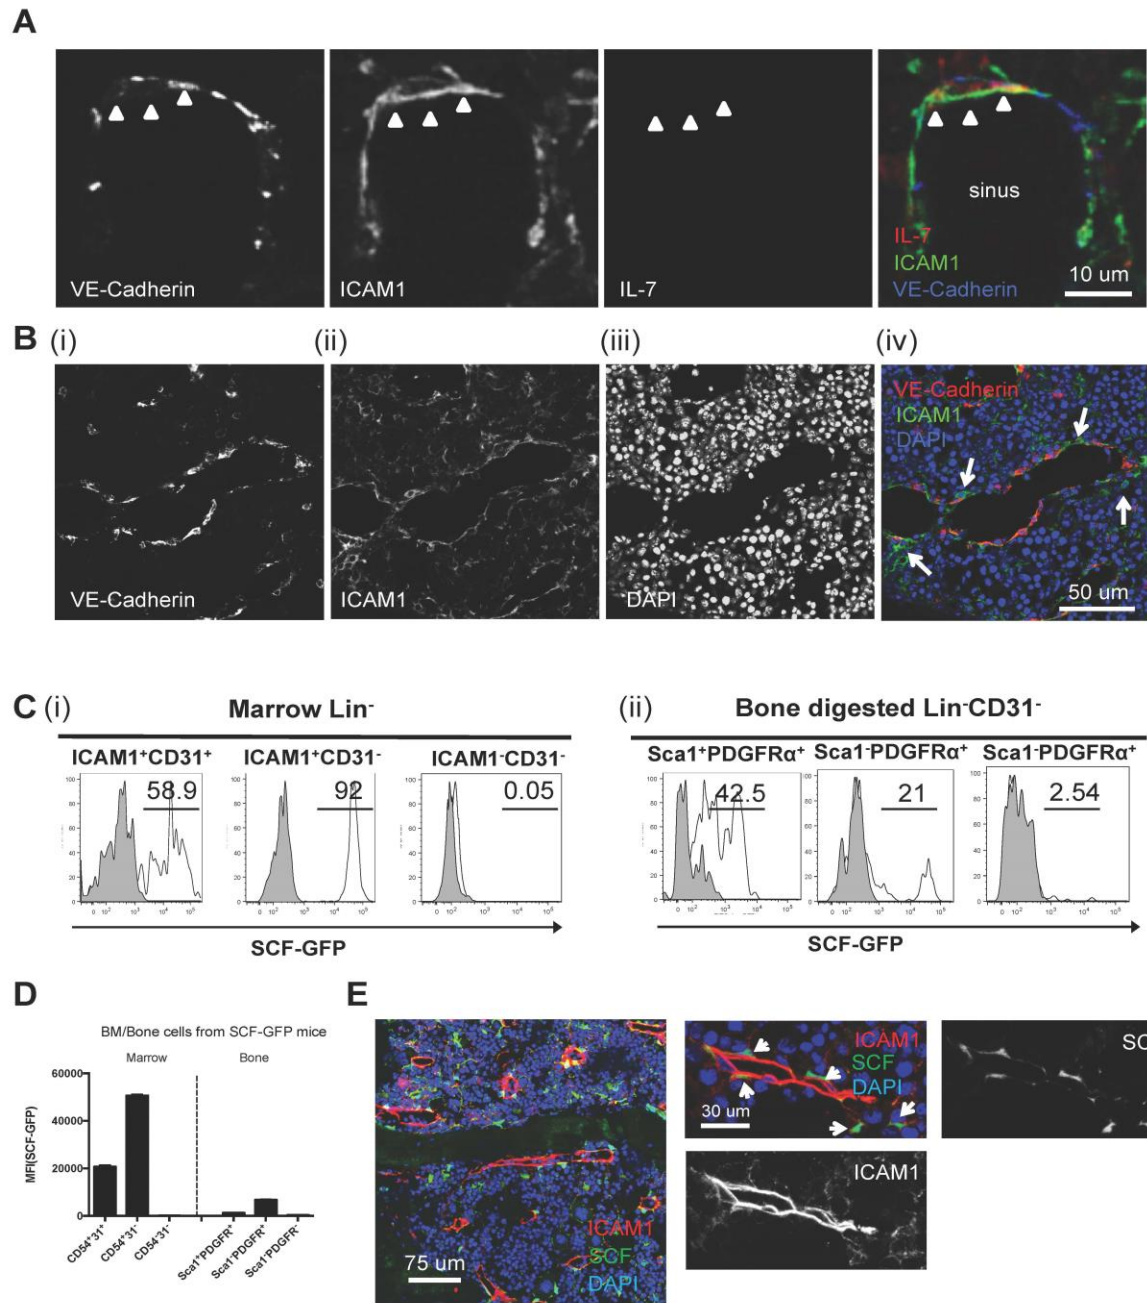

**Supplementary Fig 7.** Non endothelial ICAM1<sup>+</sup> cells are perivascular stromal cells and the majority of ICAM1<sup>+</sup>CD31<sup>-</sup>CD45<sup>-</sup>TER119<sup>-</sup> non hematopoietic cells in BM are SCF-secreting niche cells.
